# Supplementary material for: Fipronil and Fipronil Sulfone Distribution in Chicken Feathers and Eggs after Oral and Dermal Exposure
Source: MDPI journal article supplement (doi:10.3390/foods10123077), 2021-12-10
Supplement: s1 [file s1]

## Supplementary Materials

**Table S1.** Active ingredients investigated in the multiresidue UHPLC MS/MS method.

| Cpd Name           | MRM*    | r.t. | Cpd Name        | MRM     | r.t.  | Cpd Name            | MRM     | r.t.  |
|--------------------|---------|------|-----------------|---------|-------|---------------------|---------|-------|
| Methamidophos      | 142>94  | 2.84 | Fenamidone      | 312>92  | 12.04 | Difenconazole       | 406>251 | 14.99 |
| Cyromazine         | 167>85  | 2.98 | Boscalid        | 343>307 | 12.19 | Chlorpyrifos-methyl | 321>125 | 15.02 |
| Formetanate        | 222>165 | 3.30 | Mandipropamid   | 412>328 | 12.24 | Ametoctradin        | 276>149 | 15.07 |
| Acephate           | 184>143 | 3.49 | Dimethomorph    | 388>301 | 12.43 | Trifloxystrobin     | 409>186 | 15.18 |
| Propamocarb        | 189>102 | 3.60 | cyproconazole   | 292>70  | 12.50 | Cycloate            | 216>83  | 15.20 |
| Pymetrozine        | 218>105 | 3.60 | Benthiavalicarb | 340>180 | 12.67 | Indoxacarb          | 528>203 | 15.22 |
| Omethoate          | 214>125 | 3.90 | Molinate        | 188>126 | 12.77 | Hexaflumuron        | 461>158 | 15.24 |
| Oxamyl             | 237>72  | 4.44 | Chloroxuron     | 291>72  | 12.79 | Cycloxydim          | 326>180 | 15.70 |
| Carbendazim        | 192>160 | 4.83 | Spirotetramat   | 374>302 | 12.80 | Quizalofop-ethyl    | 373>271 | 15.76 |
| Methomyl           | 163>88  | 4.89 | Myclobutanil    | 289>125 | 12.86 | Emamectin Benzoate  | 887>158 | 15.76 |
| Thiamethoxam       | 292>211 | 4.96 | Bifenazate      | 301>198 | 12.91 | Buprofezin          | 306>201 | 15.89 |
| Monocrotophos      | 224>127 | 5.11 | Triadimenol     | 296>70  | 12.99 | Metaflumizone       | 507>178 | 15.94 |
| Chlordimeform      | 197>117 | 5.13 | Azinphos-ethyl  | 346>97  | 13.09 | Tebufenpyrad        | 334>117 | 15.96 |
| Imidacloprid       | 256>175 | 5.74 | Fenhexamid      | 302>97  | 13.11 | Propaquizafop       | 444>299 | 16.03 |
| Methiocarb         | 242>185 | 5.86 | Mepanipyrim     | 224>106 | 13.18 | Allethrin           | 303>135 | 16.10 |
| Acetamiprid        | 223>126 | 6.10 | Tetraconazole   | 372>159 | 13.21 | Lufenuron           | 510>158 | 16.15 |
| Dimethoate         | 230>125 | 6.19 | Bupirimate      | 317>166 | 13.22 | Oxadiazon           | 362>220 | 16.16 |
| Cymoxanil          | 199>128 | 6.64 | Flufenacet      | 364>142 | 13.24 | Piperonyl butoxide  | 356>177 | 16.24 |
| Thiacloprid        | 253>126 | 6.82 | Iprovalicarb    | 321>119 | 12.95 | Pyriproxyfen        | 322>96  | 16.34 |
| Atrazine-desethyl  | 188>146 | 6.92 | Cyazofamid      | 325>108 | 13.27 | Chlorpyrifos        | 350>198 | 16.41 |
| Aldicarb           | 213>89  | 7.43 | Napropamide     | 272>58  | 13.36 | Hexythiazox         | 353>228 | 16.45 |
| Pirimicarb         | 239>72  | 8.02 | Fipronil        | 435>250 | 13.69 | Pendimethalin       | 282>212 | 16.55 |
| Dichlorvos         | 221>109 | 8.60 | Cyprodinil      | 226>77  | 13.59 | Flufenoxuron        | 489>158 | 16.62 |
| Thiophanate-methyl | 343>151 | 8.61 | Fenamiphos      | 304>217 | 13.64 | Propargite          | 368>231 | 16.71 |
| Metribuzin         | 215>187 | 8.70 | Flusilazol      | 316>165 | 13.67 | Etoazole            | 160>141 | 16.74 |

|                      |         |       |                  |         |       |                   |         |       |
|----------------------|---------|-------|------------------|---------|-------|-------------------|---------|-------|
| Carbofuran           | 222>165 | 8.77  | Iprodione        | 330>245 | 13.78 | Fenpyroximate (E) | 422>366 | 16.99 |
| Carbaryl             | 202>145 | 9.30  | Fipronil sulfone | 451>282 | 14.24 | Deltamethrin      | 523>281 | 17.16 |
| Imazalil             | 297>159 | 9.84  | Aclonifen        | 265>182 | 13.96 | Acrinathrin       | 559>208 | 17.32 |
| Fosthiazate          | 284>61  | 9.94  | Penconazole      | 284>70  | 13.96 | Pyridaben         | 365>147 | 17.48 |
| Disulfoton-Sulfoxide | 291>185 | 10.10 | Tebuconazole     | 308>70  | 14.19 | T-Fluvalinate     | 503>208 | 17.51 |
| Flutriafol           | 302>95  | 10.38 | Benalaxyl        | 326>148 | 14.34 | Bifenthrin        | 442>181 | 18.20 |
| Metalaxyl            | 280>160 | 10.88 | Spinosyn A       | 732>142 | 14.42 | Fenarimol         | 331>313 | 18.13 |
| Pyrimethanil         | 200>106 | 10.88 | Zoxamide         | 336>187 | 14.45 | Etofenprox        | 394>177 | 18.21 |
| Methidathion         | 303>145 | 11.00 | Bitertanol       | 338>70  | 14.62 |                   |         |       |
| Azinphos-methyl      | 318>261 | 11.23 | Pyraclostrobin   | 388>194 | 14.63 |                   |         |       |
| Chlorantraniliprole  | 483>285 | 11.39 | Cyflufenamid     | 413>295 | 14.67 |                   |         |       |
| Azoxystrobin         | 404>344 | 11.73 | Clofentezin      | 303>138 | 14.69 |                   |         |       |
| Diethofencarb        | 268>226 | 11.78 | Phosalone        | 368>182 | 14.74 |                   |         |       |
| Propanil             | 218>162 | 11.92 | Metrafenone      | 409>209 | 14.88 |                   |         |       |
| diclobutrazol        | 328>70  | 11.99 | Spinosyn D       | 746>142 | 14.99 |                   |         |       |

\*Mass transition used for quantitative analysis.

**Table S2.** Regression equation and  $r^2$  of the active ingredients.

|                     | Fipronil                 | Fipronil sulfone       |
|---------------------|--------------------------|------------------------|
|                     | 0.5-517 µg/L             | 0.1-1031 µg/L          |
| Regression equation | $Y=157894.21x + 3031.09$ | $Y=11400.78x + 140.94$ |
| $r^2$               | $0.9929 \pm 0.40\%$      | $0.9998 \pm 0.85\%$    |

\* 6-point calibration curve (three replicates).

**Table S3.** Intra-day repeatability and inter-day reproducibility of fipronil and fipronil sulfone concentrations in eggs, and feathers.

| Standard conc.   | precision RSD%  |       |                  |       |
|------------------|-----------------|-------|------------------|-------|
| (mg/kg)          | Intra-day (n=6) |       | Inter-day (n=12) |       |
| Fipronil         | r. time         | area  | r. time          | area  |
| eggs             |                 |       |                  |       |
| 0.51             | 0.09            | 17.27 | 0.07             | 17.94 |
| 1.02             | 0.07            | 12.42 | 0.08             | 18.22 |
| 10.2             | 0.07            | 6.34  | 0.07             | 12.69 |
| feathers         |                 |       |                  |       |
| 0.51             | 0.06            | 6.52  | 0.05             | 9.51  |
| 1.02             | 0.08            | 7.16  | 0.07             | 10.02 |
| 10.2             | 0.05            | 5.49  | 0.05             | 7.98  |
| Fipronil sulfone |                 |       |                  |       |
| eggs             |                 |       |                  |       |
| 0.10             | 0.06            | 2.64  | 0.07             | 7.13  |
| 1.01             | 0.05            | 10.13 | 0.05             | 14.13 |
| 10.1             | 0.06            | 9.74  | 0.06             | 11.12 |
| feathers         |                 |       |                  |       |
| 0.05             | 0.05            | 5.69  | 0.09             | 6.56  |
| 1.01             | 0.07            | 5.61  | 0.09             | 8.45  |
| 10.1             | 0.05            | 6.45  | 0.06             | 7.56  |

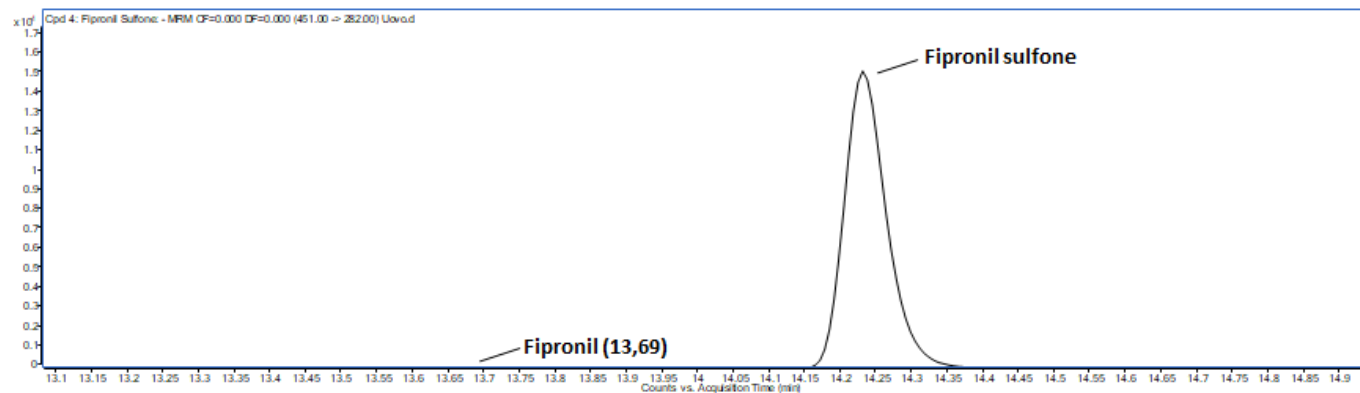

Figure S1: MRM chromatogram of fipronil and fipronil sulfone in egg sample after oral exposure.

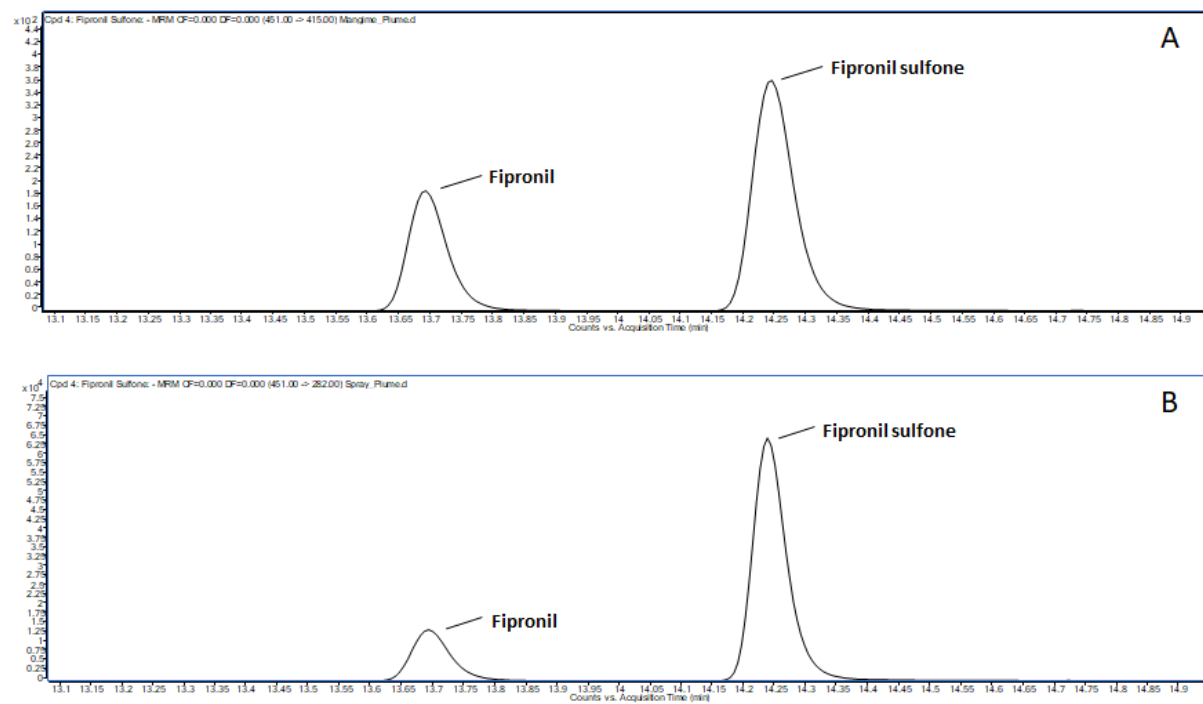

Figure S2: MRM chromatogram of fipronil and fipronil sulfone in feathers samples after oral (A) and dermal (B) exposure.
